# Supplementary material for: Kinetic study of TBD catalyzed δ-valerolactone polymerization using a gas-driven droplet flow reactor
Source: Royal Society of Chemistry journal article supplement (doi:10.1039/c9re00046a), 2019-01-01
Supplement: c9re00046a1.pdf [file c9re00046a1.pdf]

## Electronic Supporting Information

### **Kinetic study of TBD catalyzed $\delta$ -valerolactone polymerization via a gas-driven droplet flow reactor**

Shiyao Lu and Kai Wang\*

The State Key Lab of Chemical Engineering, Department of Chemical Engineering, Tsinghua University, Beijing 100084, China

\*Corresponding author email: [kaiwang@tsinghua.edu.cn](mailto:kaiwang@tsinghua.edu.cn)

## Experimental Platform

The gas-driven droplet reactor system is shown in Fig. S1(a). The left part of the platform was feeding pumps of  $\delta$ -valerolactone ( $\delta$ -VL) solution, TBD (1,5,7-triazabicyclo[4.4.0]dec-5-ene) and benzyl alcohol (BnOH) mixture solution, and benzoic acid (BA) solution (PHD Ultra 70-3310C, Harvard Apparatus). The right part of the platform was the 6-way valve (Idex Health & Science), the fluoroplastics reaction tubes, water bath (Beijing Hengtai), the gas feed system (Sevenstar), and the feeding pump of washing toluene (PPI, Hangzhou China). Fig. S1(b) shows some details near the 6-way valve. A droplet in the outlet tube is indicated. Fig. S1(c) is a photo of the screw tube mixer,<sup>1</sup> which inner structure is shown by a microscope picture.

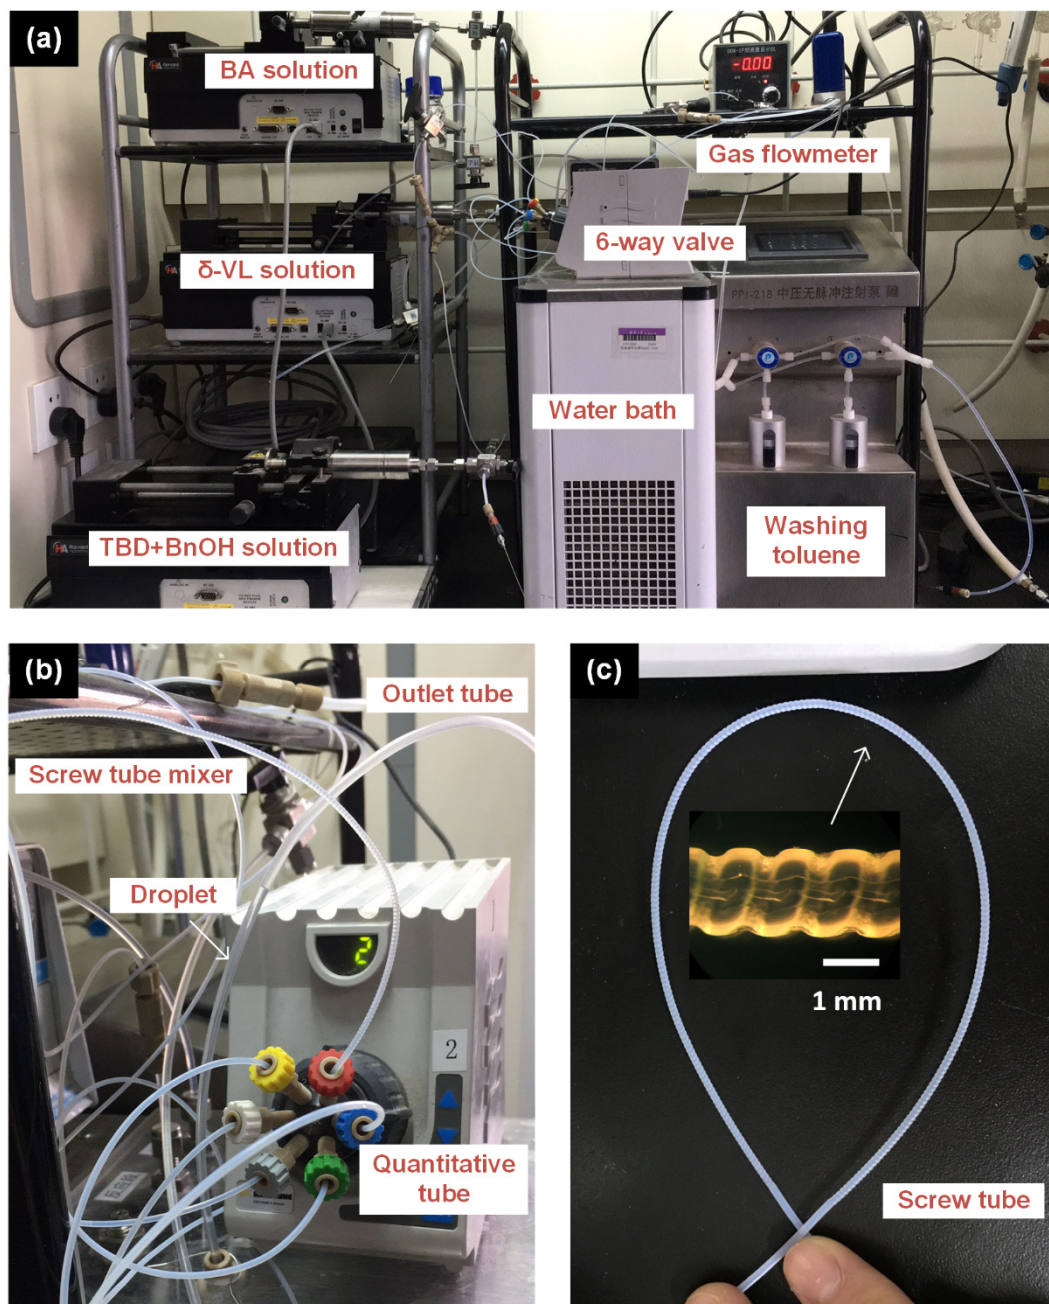

**Fig. S1** Photos of the gas-driven droplet reactor system

(a) The experimental platform; (b) The 6-way valve and the tubes; (c) Photos of the screw tube mixer. Some assistant valves are not shown in the main text, Fig. 1, for clear exhibition.

## <sup>1</sup>H NMR analysis

The  $\delta$ -valerolactone conversion and the average molecule weight were analyzed by <sup>1</sup>H-NMR (JNM-ECA600, 600 MHz, Chloroform-*d*). Fig. S2(a) shows a spectrum of PVL product. The peaks are 1.83 – 1.46 (m, -CH<sub>2</sub>CH<sub>2</sub>CH<sub>2</sub>CH<sub>2</sub>OCO-), 2.31 (t, -CH<sub>2</sub>CH<sub>2</sub>CH<sub>2</sub>CH<sub>2</sub>OCO-), 3.62 (t, -CH<sub>2</sub>OH), 4.06 (s, -CH<sub>2</sub>CH<sub>2</sub>CH<sub>2</sub>CH<sub>2</sub>OCO-), 5.09 (s, ArCH<sub>2</sub>O-), and 7.33 (s, aromatic). Fig. S2(b) shows a spectrum of  $\delta$ -VL. The peaks are 2.03 – 1.53 (m, -CH<sub>2</sub>CH<sub>2</sub>CH<sub>2</sub>CH<sub>2</sub>OCO-), 2.51 (t, -CH<sub>2</sub>CH<sub>2</sub>CH<sub>2</sub>CH<sub>2</sub>OCO-), 4.59 – 4.16 (m, -CH<sub>2</sub>CH<sub>2</sub>CH<sub>2</sub>CH<sub>2</sub>OCO-).

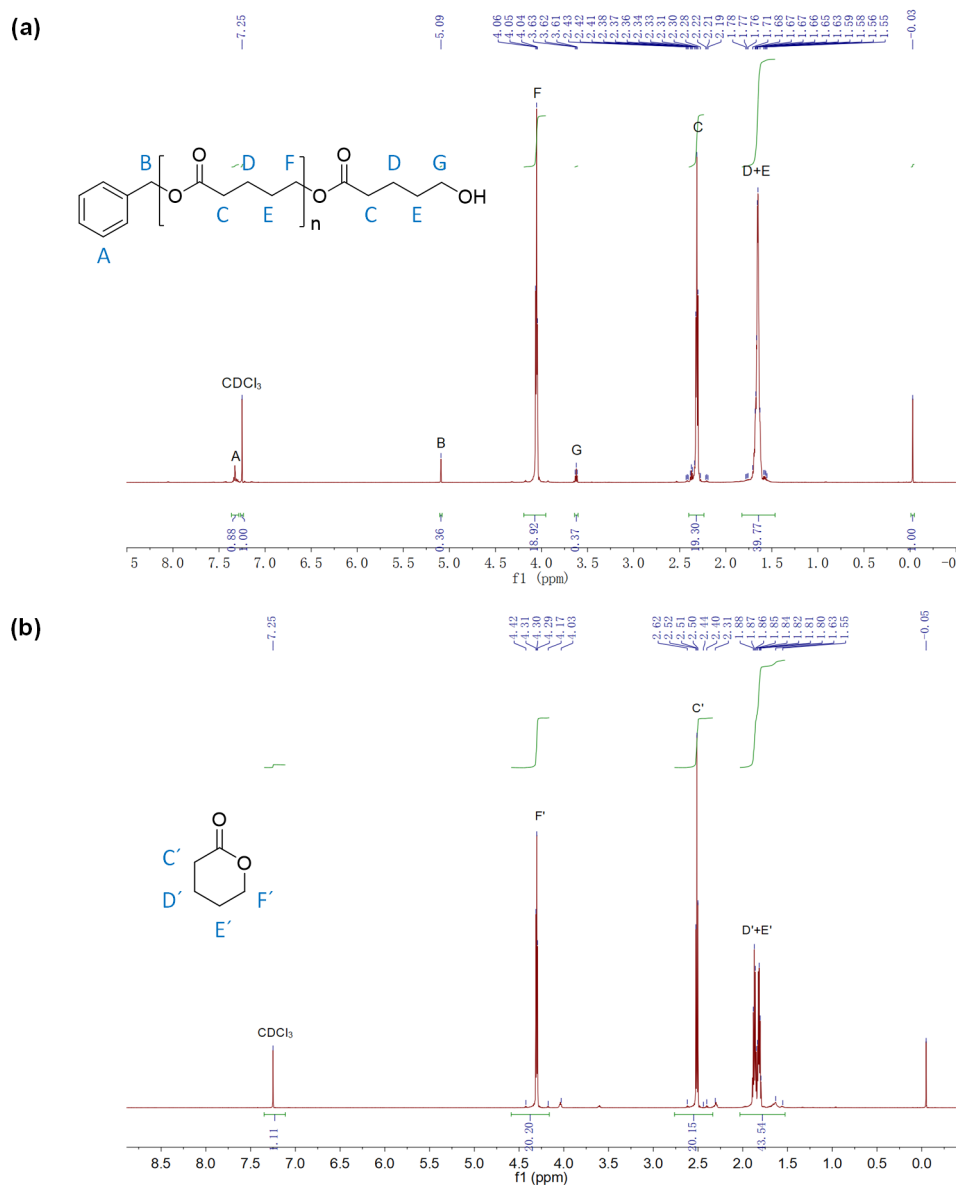

**Fig. S2** <sup>1</sup>H-NMR spectra of PVL and  $\delta$ -VL.

The corresponding molecular structure of the peaks are shown in the figures.

Using the peak area ratio, the VL conversion was calculated as

$$x = (F + G) / (F + G + F') \quad (S1)$$

And the number-average molecular weight  $M_{n,NMR}$  was obtained from the peak area ratio of  $(F+G)/B$ .

$$M_{n,NMR} = M_{\text{BnOH}} + M_{\text{VL}} \left( \frac{F+G}{B} \right) \quad (\text{S2})$$

in which  $M_{\text{BnOH}}$  and  $M_{\text{VL}}$  are molecular weights of benzyl alcohol and  $\delta$ -valerolactone, respectively.

### GPC analysis

Gel permeation chromatography (GPC) analysis was used to determine the molecule weight distribution of PVL products. A Waters GPC system equipped with 2707 autosampler, 1515 HPLC pump, 2414 refractive index detector, and 3 styragel columns (HR1, HR2 and HR3 at 30 °C). THF was used as the eluent at a flow rate of 1 mL/min. The standards used to calibrate the polymer molecule weight was polystyrene (SHODEX SL-105 STANDARD) with molecule weight range from 610~20300 g/mol, which covered the molecule weights of PVL (from about 2000 to 15000 g/mol). Some typical spectra of the PVL products during the experiments are shown in Fig. S3.

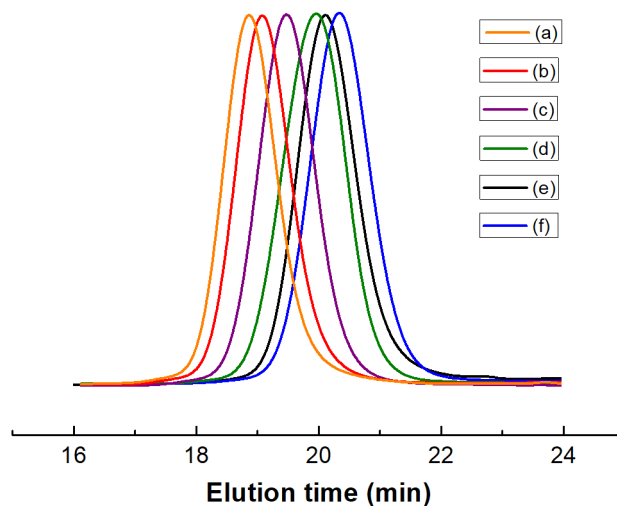

**Fig. S3** GPC spectra of PVL products.

The experimental conditions are  $[VL]_0 = 1 \text{ mol/L}$ ,  $[TBD]_0 = 0.005 \text{ mol/L}$ , and  $[BnOH]_0 = 0.01 \text{ mol/L}$  at  $T = 30^\circ\text{C}$ . (a) to (f) represent Samples 1 to 6 in Table 1.

## References

1. K. Wang, H. Zhang, Y. Shen, A. Adamo and K. F. Jensen, *React Chem Eng*, 2018, **3**, 707-713.
